# Supplementary material
Source: PubMed Central journal article supplement (PMC3620396)
Supplement: mmc4.pdf [file mmc4.pdf]

# Supplemental Figure S4

**A**

Proliferation (Ki-67 staining in UACC 903 xenograft tumors)

Buffer

siScrambled

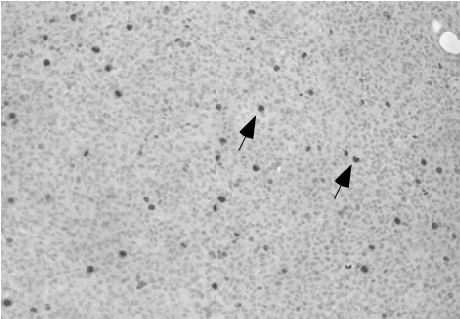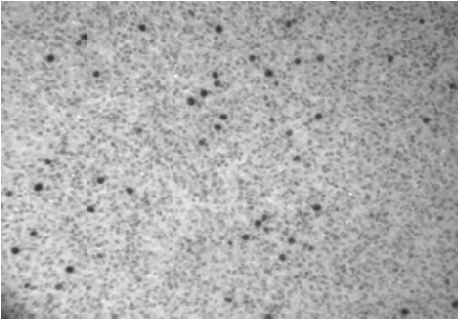

siAURKB#1

siAURKB#3

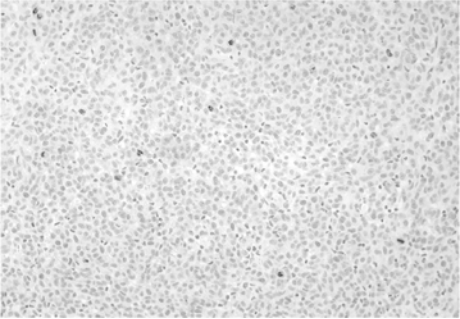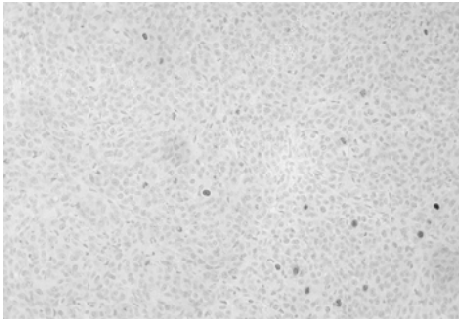

siWEE1#2

siWEE1#3

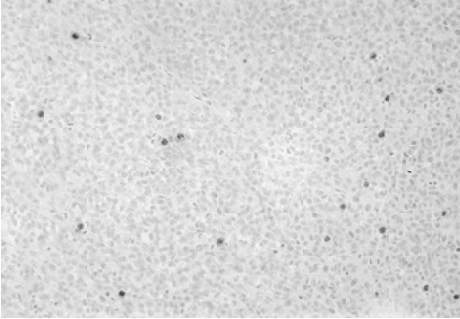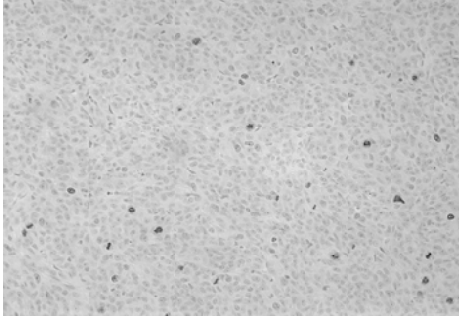

200x

**B**

Apoptosis (TUNEL staining in UACC 903 xenograft tumors)

Buffer

siScrambled

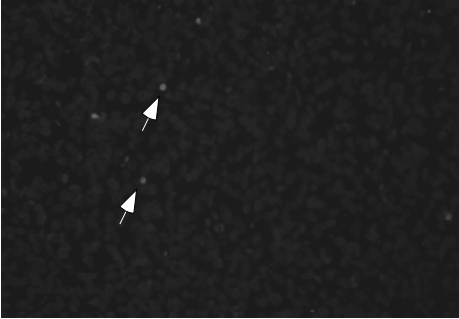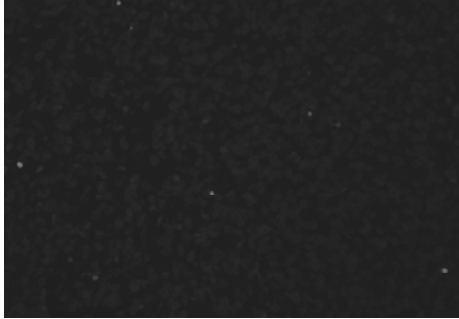

siAURKB#1

siAURKB#3

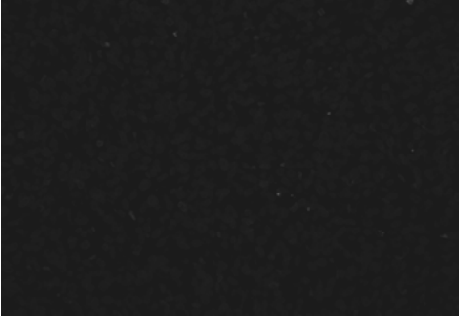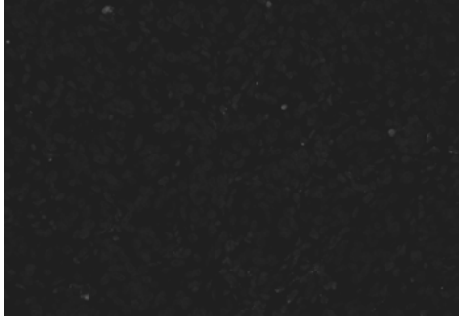

siWEE1#2

siWEE1#3

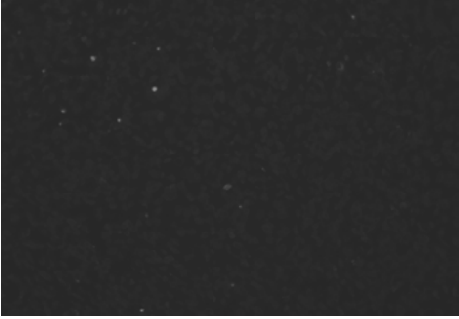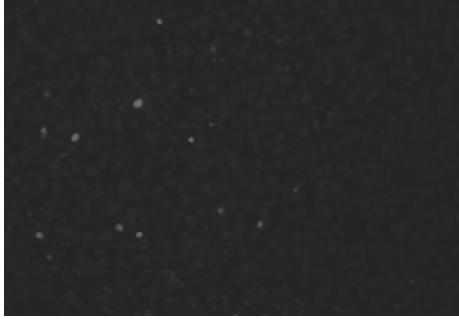

200x
