# Supplementary material
Source: PubMed Central journal article supplement (PMC3620396)
Supplement: mmc6.pdf [file mmc6.pdf]

# Supplemental Figure S6

IC<sub>50</sub> values after 24h treatment with VX-680

**A**

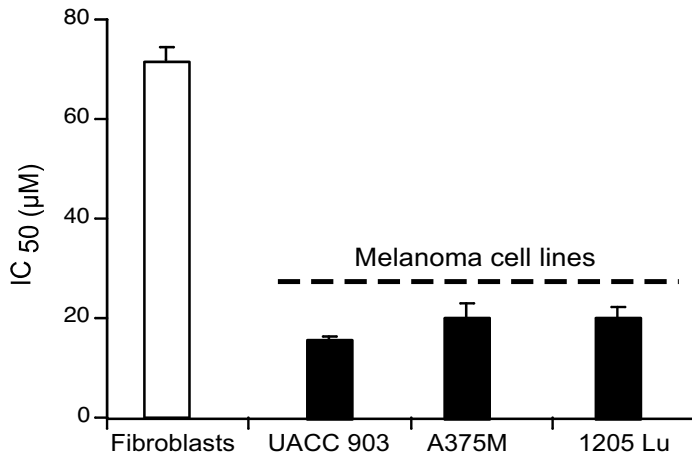

**B**

Cell cycle analysis - 48h treatment with VX-680

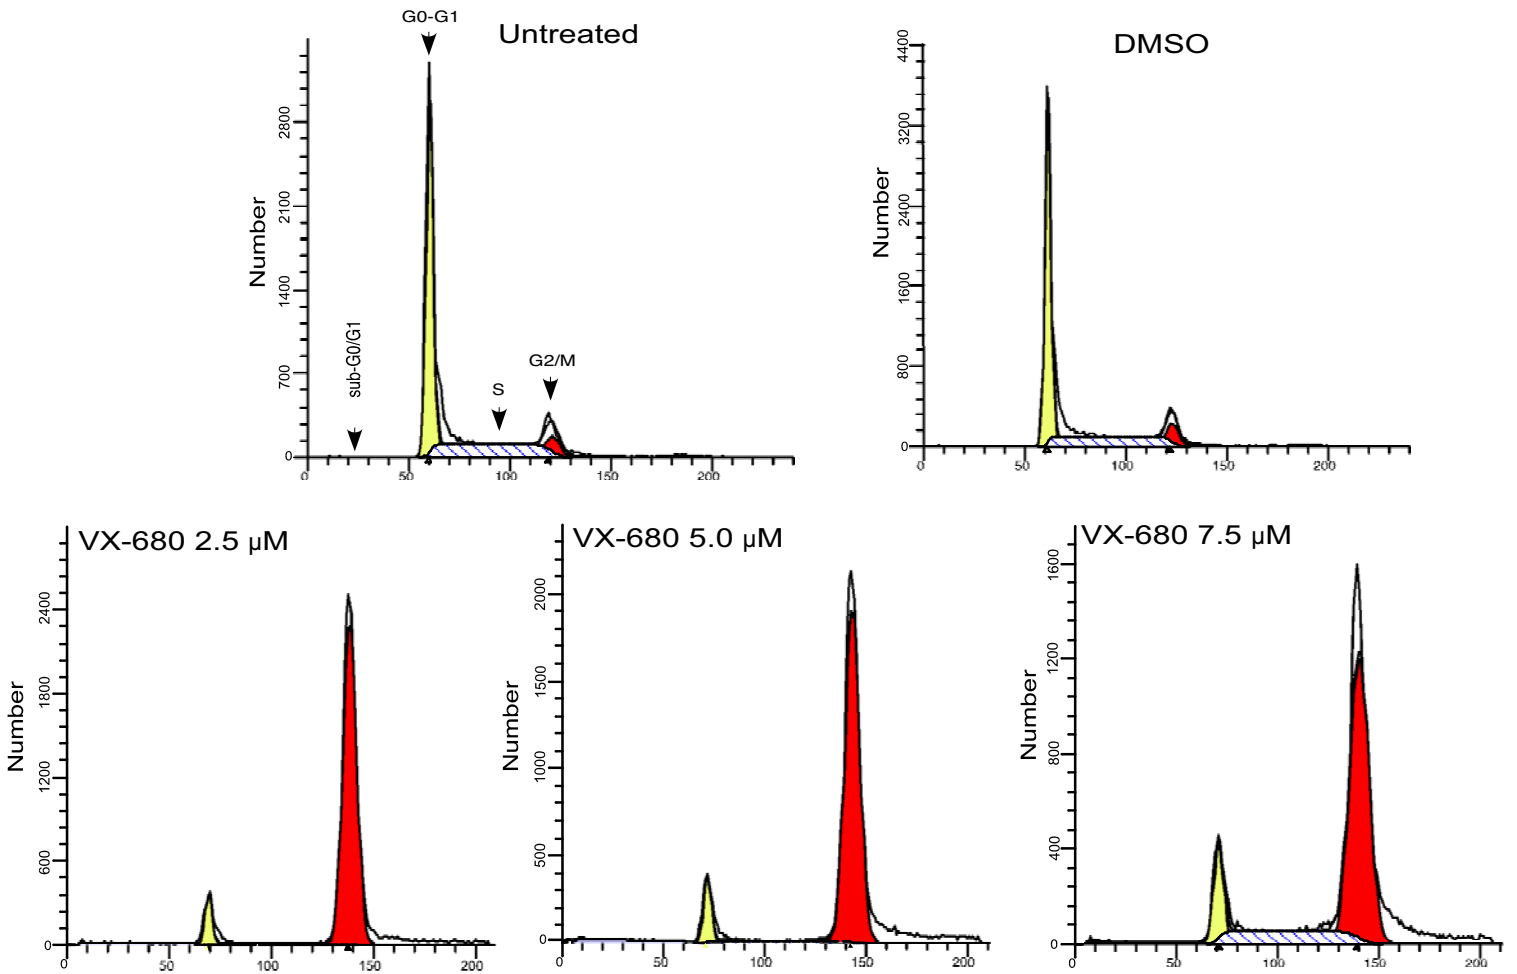

|            | sub-G0/G1 | G0/G1 | S    | G2/M |
|------------|-----------|-------|------|------|
| UACC 903   |           |       |      |      |
| Untreated  | 1.0       | 63.2  | 29.4 | 7.3  |
| DMSO       | 0.8       | 63.6  | 28.1 | 8.3  |
| VX-680(µM) |           |       |      |      |
| 2.5        | 5.9       | 7.5   | 1.2  | 91.3 |
| 5.0        | 8.1       | 9.0   | 3.4  | 87.6 |
| 7.5        | 3.9       | 12.4  | 17.9 | 69.7 |
