# Supplementary material
Source: PubMed Central journal article supplement (PMC3620396)

# Supplemental Figure S1

UACC 903

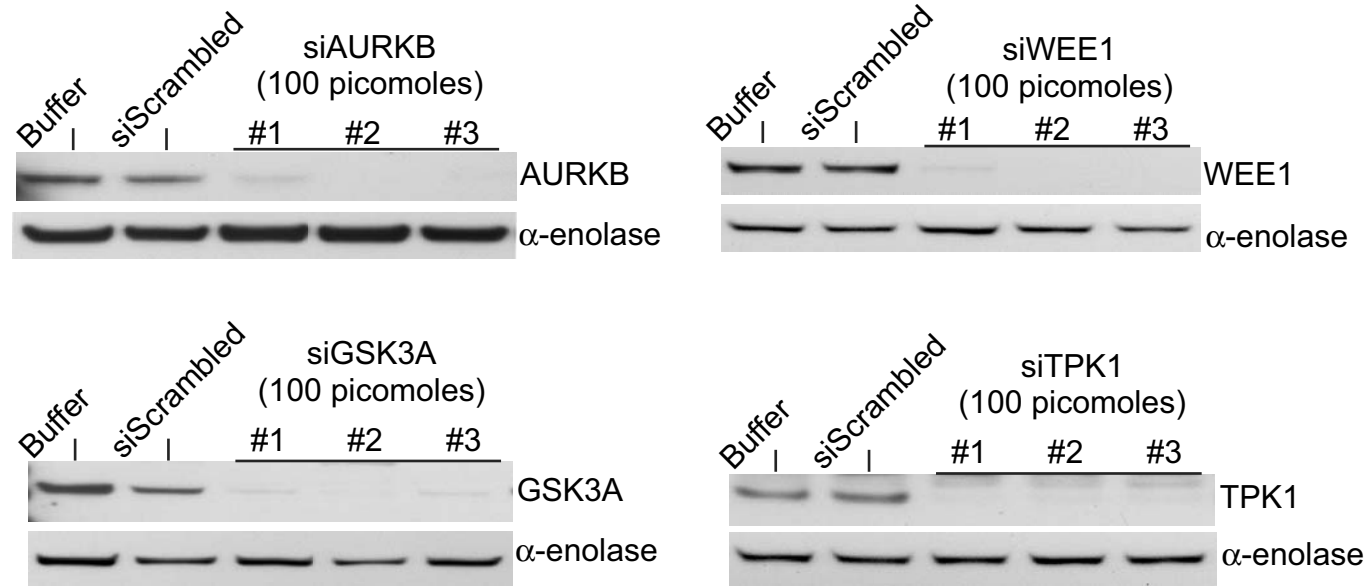

Supplement: mmc1.pdf [file mmc1.pdf]

## Supplemental Figure S2

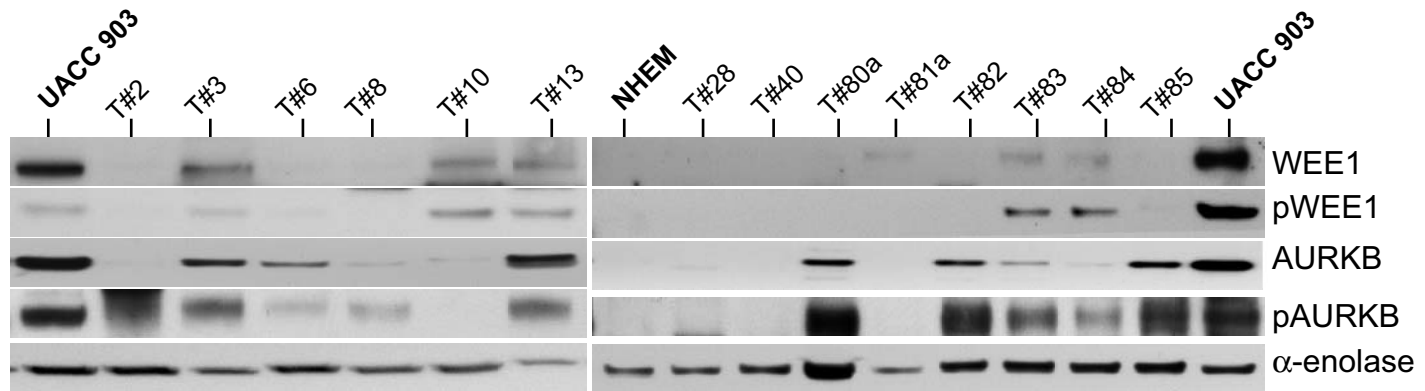

Supplement: mmc2.pdf [file mmc2.pdf]

# Supplemental Figure S3

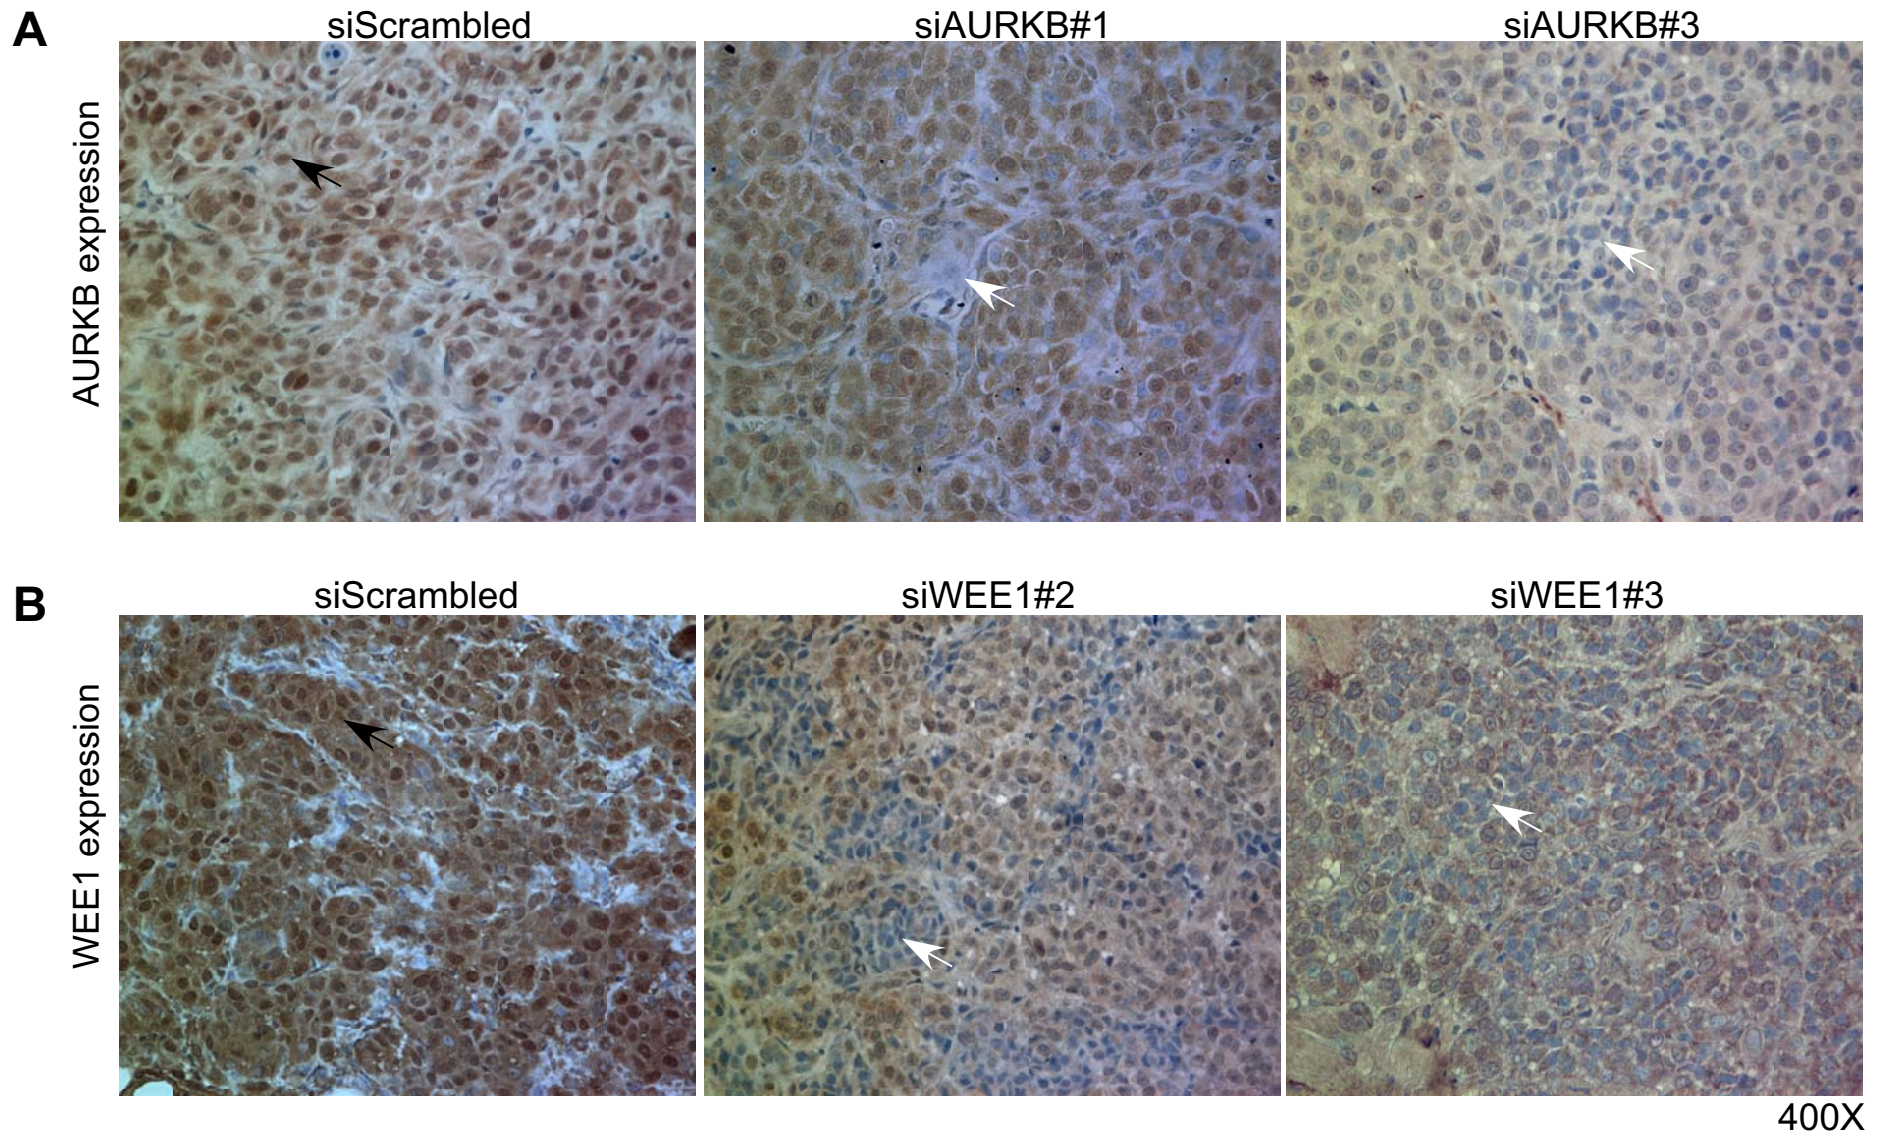

Supplement: mmc3.pdf [file mmc3.pdf]

# Supplemental Figure S5

**A**

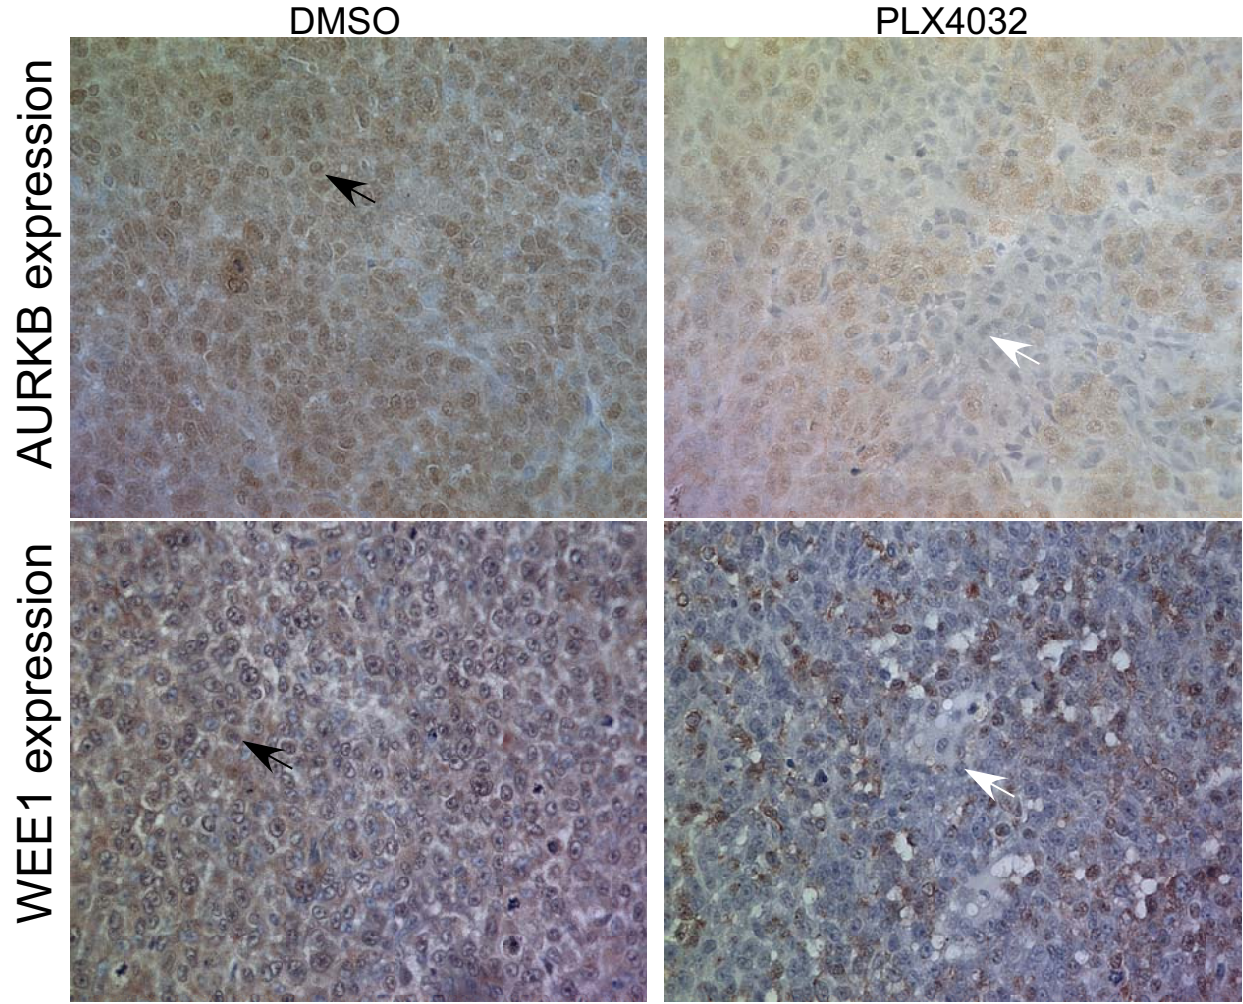

**B**

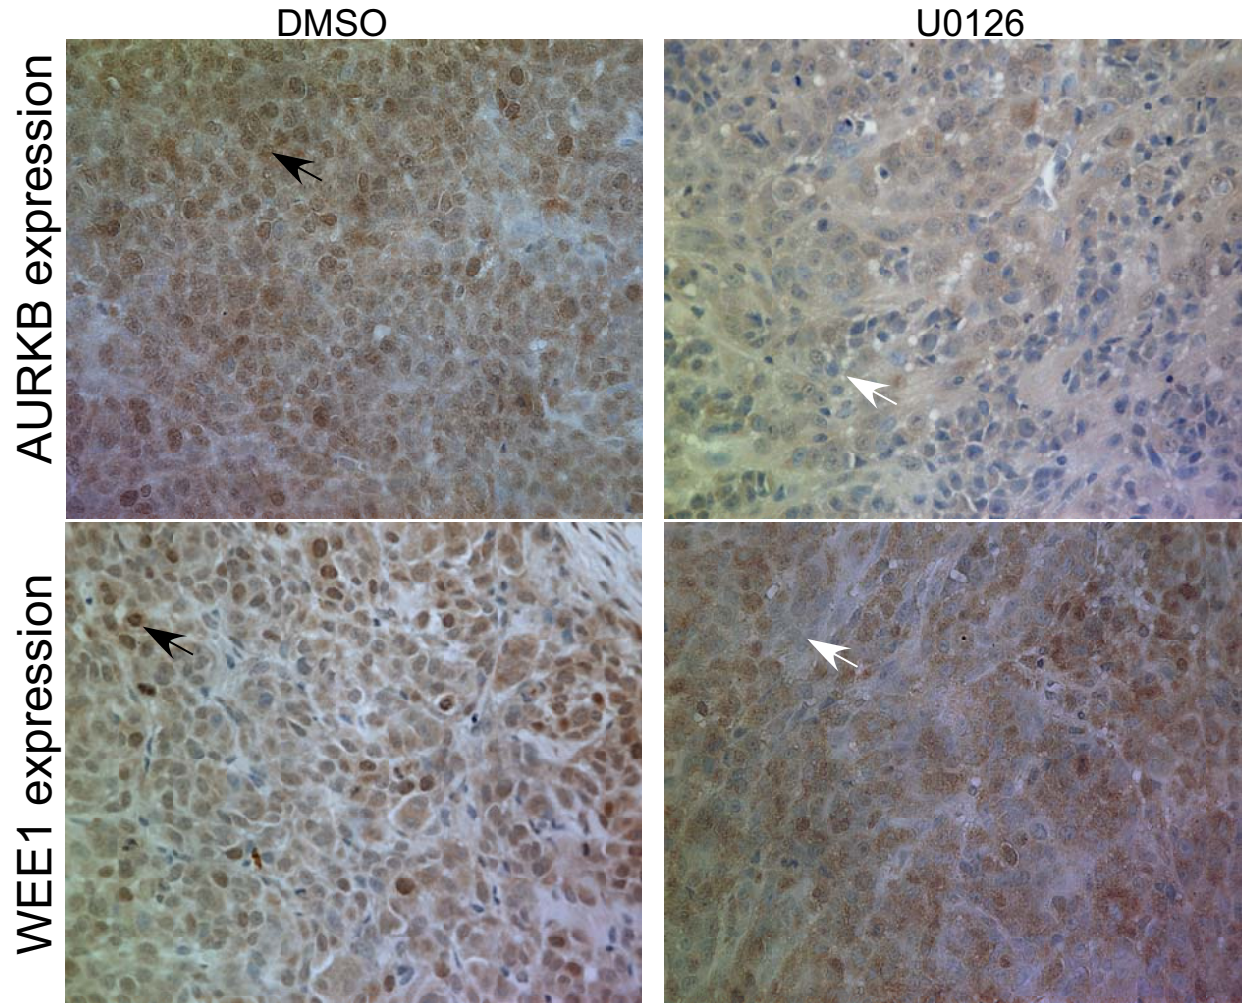

400X

Supplement: mmc5.pdf [file mmc5.pdf]
